# Supplementary material for: Vestibular Deficits in Deafness: Clinical Presentation, Animal Modeling, and Treatment Solutions
Source: Frontiers journal article supplement (doi:10.3389/fneur.2022.816534), 2022-04-04
Supplement: Table_1.pdf [file Table_1.pdf]

## Human non syndromic and syndromic hearing loss with vestibular dysfunction

| Human related SNHL (OMIM)         | Gene symbol                  | Location | Ear pathology/ gene function                                | Vestibular findings in human                                                                | Vestibular findings in animal models                                                                                                                    | References |
|-----------------------------------|------------------------------|----------|-------------------------------------------------------------|---------------------------------------------------------------------------------------------|---------------------------------------------------------------------------------------------------------------------------------------------------------|------------|
| <b>NON SYNDROMIC HEARING LOSS</b> |                              |          |                                                             |                                                                                             |                                                                                                                                                         |            |
| <i>DFNA1</i><br>(602121)          | <i>DIAPH1</i>                | 5q31.3   | Hair bundle development and functioning                     | Vestibular dysfunction not fully penetrant. Findings consistent with endolymphatic hydrops. |                                                                                                                                                         | [1]        |
| <i>DFNA3</i><br>(121011-604418)   | <i>GJB2</i> –<br><i>GJB6</i> | 13q12.11 | Cochlea ion homeostasis                                     | Vestibular dysfunction not fully penetrant.<br>Otolithic and canalar dysfunction.           | Reduced inner ear size, abnormal distribution of otoliths and reduced otolith size and developmentally delayed semicircular canals in cx30.3 zebrafish. | [2-4]      |
| <i>DFNA6/14</i><br>(606201)       | <i>WFS1</i>                  | 4p16.1   | Oxidative stress, metabolims & mitochondria                 | Vestibular dysfunction in few patients.                                                     | Vestibular dysfunction in the mouse model ( <i>tilted – tlt</i> ): complete lack of otoconia in utricle and saccule.                                    | [5, 6]     |
| <i>DFNA7</i><br>(600298)          | <i>LMX1A</i>                 | 1q23.3   | Hair cell's adhesion and maintenance                        | About half of the affected individuals display vestibular dysfunction.                      | Vestibular dysfunction in the mouse model ( <i>Lmx1a</i> ): circling behavior, impaired righting reflex, hyperactivity.                                 | [7-9]      |
| <i>DFNA9</i><br>(603196)          | <i>COCH</i>                  | 14q12    | Transmembrane or secreted proteins and extracellular matrix | Variable vestibular dysfunction up to severe vestibular deficit/areflexia.                  | Vestibular dysfunction in the mouse model: abnormal vestibular evoked potentials                                                                        | [10-18]    |
| <i>DFNA11</i><br>(276903)         | <i>MYO7A</i>                 | 11q13.5  | Hair bundle development and functioning                     | Vestibular dysfunction not fully penetrant.<br>Variable degree of vestibular dysfunction.   |                                                                                                                                                         | [19-21]    |
| <i>DFNA13</i><br>(120290)         | <i>COL11A2</i>               | 6p21.32  | Transmembrane or secreted proteins and extracellular matrix | Various caloric abnormalities observed in about half of the subject                         |                                                                                                                                                         | [22]       |
| <i>DFNA15</i><br>(602460)         | <i>POU4F3</i>                | 5q32     | Hair cell's adhesion and maintenance                        | Vestibular dysfunction not fully penetrant.<br>Mild to severe vestibular dysfunction.       | <i>Pou4f3<sup>ddl/ddl</sup></i> mice exhibit vertical head tossing, circling and general hyperactive behavior indicative of a vestibular dysfunction    | [23-25]    |
| <i>DFNA17</i><br>(160775)         | <i>MYH9</i>                  | 22q12.3  | Hair cell's adhesion and maintenance                        | Associated to cochleosaccular degeneration.                                                 |                                                                                                                                                         | [26]       |
| <i>DFNA20/26</i><br>(102560)      | <i>ACTG1</i>                 | 17q25.3  | Hair bundle development and functioning                     | Vestibular dysfunction not fully penetrant.                                                 |                                                                                                                                                         | [27]       |

## Mild to severe hyporeflexia.

|                                   |                                    |          |                                                             |                                                                                                         |                                                                                                                                                          |          |
|-----------------------------------|------------------------------------|----------|-------------------------------------------------------------|---------------------------------------------------------------------------------------------------------|----------------------------------------------------------------------------------------------------------------------------------------------------------|----------|
| <i>DFNA22</i><br>(600970)         | <i>MYO6</i>                        | 6q14.1   | Hair bundle development and functioning                     |                                                                                                         | Vestibular dysfunction in mouse with MYO6 mutation : the <i>Snell's waltzer</i> (sv) mouse and <i>Turner</i> (Tur) mouse.                                | [28, 29] |
| <i>DFNA28</i><br>(608576)         | <i>GRHL2</i>                       | 8q22.3   | Transcriptional regulation                                  |                                                                                                         | Vestibular malformation and severe vestibular dysfunction in zebrafish model.                                                                            | [30]     |
| <i>DFNA41</i><br>(600844)         | <i>P2RX2</i>                       | 12q24.33 | Cochlea ion homeostasis                                     |                                                                                                         | Vestibular dysfunction observed in knock-in mouse model of DFNA41: impaired balance on rotarod and beam walking.                                         | [31]     |
| <i>DFNA69</i><br>(184745)         | <i>KITLG</i>                       | 12q21.32 | Transmembrane or secreted proteins and extracellular matrix | Vestibular dysfunction not fully penetrant.                                                             |                                                                                                                                                          | [32]     |
| <i>DFNA76</i><br>(602734)         | <i>PLS1</i>                        | 3q23     | Hair bundle development and functioning                     |                                                                                                         | Thresholds for vestibular evoked potentials are significantly elevated in mice lacking functional PLS1.                                                  | [33]     |
| <i>DFNA78</i><br>(610981)         | <i>SLC12A2</i>                     | 5q23.3   | Cochlea ion homeostasis                                     | Vestibular dysfunction with delayed motor skills.                                                       | Severe vestibular dysfunction observed in <i>Slc12a2</i> <sup>-/-</sup> mice: head bobbing, circling, collapse of vestibular compartments and epithelia. | [34-36]  |
| <i>DFNB1</i><br>(121011 – 604418) | <i>GJB2</i> -GJB6<br>(Cx26 - Cx30) | 13q12.11 | Cochlea ion homeostasis                                     | Vertigo reported by approximately half of the affected subjects.                                        | Reduced inner ear size, abnormal distribution of otoliths and reduced otolith size and developmentally delayed semicircular canals in cx30.3 zebrafish.  | [4, 37]  |
| <i>DFNB2</i><br>(276903)          | <i>MYO7A</i>                       | 11q13.5  | Hair bundle development and functioning                     | Vestibular dysfunction not fully penetrant.                                                             |                                                                                                                                                          | [38]     |
| <i>DFNB3</i><br>(602666)          | <i>MYO15A</i>                      | 17p11.2  | Hair bundle development and functioning                     |                                                                                                         | Vestibular dysfunction in mouse model of DFNB3 <i>shaker-2</i> : head-tossing, circling behavior                                                         | [39, 40] |
| <i>DFNB4</i><br>(605646)          | <i>SLC26A4</i>                     | 7q22.3   | Cochlea ion homeostasis                                     | Enlarge vestibular aqueduct and possible Mondini dysplasia. Vestibular dysfunction not fully penetrant. |                                                                                                                                                          | [41]     |

|                             |                |         |                                                             |                                                                                              |                                                                                                                                                                                                                                                                                      |          |
|-----------------------------|----------------|---------|-------------------------------------------------------------|----------------------------------------------------------------------------------------------|--------------------------------------------------------------------------------------------------------------------------------------------------------------------------------------------------------------------------------------------------------------------------------------|----------|
| <i>DFNB6</i><br>(607237)    | <i>TMIE</i>    | 3p21.31 | Hair bundle development and functioning                     |                                                                                              | Vestibular dysfunction in mouse model of <i>DFNB6 spinner</i> : head-shaking, circling behavior.                                                                                                                                                                                     | [42]     |
| <i>DFNB8/10</i><br>(605511) | <i>TMPRSS3</i> | 21q22.3 | Cochlea ion homeostasis                                     | Vestibular dysfunction not fully penetrant.<br>Mild vestibular dysfunction.                  | <i>Tmprss3</i> <sup>Y260X</sup> mice display mild vestibular syndrome that correlated histologically with a slow degeneration of saccular hair cells.                                                                                                                                | [43, 44] |
| <i>DFNB16</i><br>(606440)   | <i>STRC</i>    | 15q15.3 | Hair bundle development and functioning                     | Episodic vertigo.<br>Primarily saccular and utricular dysfunction.                           |                                                                                                                                                                                                                                                                                      | [45]     |
| <i>DFNB18B</i><br>(604487)  | <i>OTOG</i>    | 11p15.1 | Transmembrane or secreted proteins and extracellular matrix | Vestibular dysfunction not fully penetrant.<br>Some individuals have delayed age of walking. | Severe vestibular dysfunction in mouse model with <i>Otog</i> mutation ( <i>Twister</i> ).                                                                                                                                                                                           | [46-48]  |
| <i>DFNB23</i><br>(605514)   | <i>PCDH15</i>  | 10q21.1 | Hair bundle development and functioning                     |                                                                                              | Vestibular dysfunction in animal model of recessive mutations of <i>PCGH15</i> ( <i>Ames Waltzer</i> ( <i>av</i> ) mouse)                                                                                                                                                            | [49]     |
| <i>DFNB25</i><br>(613283)   | <i>GRXCR1</i>  | 4p13    | Hair bundle development and functioning                     | Vestibular dysfunction not fully penetrant.                                                  |                                                                                                                                                                                                                                                                                      | [50]     |
| <i>DFNB31</i><br>(607928)   | <i>WRHN</i>    | 9q32    | Hair bundle development and functioning                     |                                                                                              | Vestibular dysfunction in mouse model of <i>DFNB31 Whirler</i> ( <i>wi</i> ): circling and head-bobbing.                                                                                                                                                                             | [51]     |
| <i>DFNB36</i><br>(606351)   | <i>ESPN</i>    | 1p36.31 | Hair bundle development and functioning                     | Vestibular areflexia.                                                                        |                                                                                                                                                                                                                                                                                      | [52]     |
| <i>DFNB37</i><br>(600970)   | <i>MYO6</i>    | 6q14.1  | Hair bundle development and functioning                     | Vestibular dysfunction in many individuals with delayed age of walking.                      |                                                                                                                                                                                                                                                                                      | [53]     |
| <i>DFNB59</i><br>(610219)   | <i>PJVK</i>    | 2q31.2  | Oxidative stress, metabolims & mitochondria                 | Central vestibular dysfunction.                                                              |                                                                                                                                                                                                                                                                                      | [54]     |
| <i>DFNB68</i><br>(605111)   | <i>S1PR2</i>   | 19p13.2 | Cochlea ion homeostasis                                     |                                                                                              | Vestibular dysfunction observed in <i>Slpr2</i> <sup>-/-</sup> mouse: head tilting, poor swimming ability, progressive deterioration of vestibular epithelium and loss or deformity of utricular and saccular otoconia.<br><br>Vestibular dysfunction in zebrafish model: Structural | [55-59]  |

|                                             |               |          |                                                                    |                                                                                                                                  |                                                                                                                                                                                            |          |
|---------------------------------------------|---------------|----------|--------------------------------------------------------------------|----------------------------------------------------------------------------------------------------------------------------------|--------------------------------------------------------------------------------------------------------------------------------------------------------------------------------------------|----------|
|                                             |               |          |                                                                    |                                                                                                                                  | defects are identified within the otic vesicle, the semicircular canals, otoliths, utricle, and saccule.                                                                                   |          |
| <i>DFNB82</i><br>(609245)                   | <i>GPSM2</i>  | 1p13.3   | Hair bundle development and functioning                            |                                                                                                                                  | Vestibular dysfunction in mouse model with <i>GPSM2</i> mutation: hyperactive behavior, circling, short stereocilia.                                                                       | [60]     |
| <i>DFNB84</i><br>(603317)                   | <i>PTPRQ</i>  | 12q21.31 | Hair bundle development and functioning                            | Severe vestibular dysfunction in all individuals.                                                                                | Hair bundle defects are observed in the vestibule of <i>Ptpqr</i> <sup>-/-</sup> mice.<br><br>Vestibular dysfunction observed in Doberman Pinschers with <i>PTPRQ</i> mutation: head tilt. | [61-63]  |
| <i>DFNB101</i><br>(615762)                  | <i>GRXCR2</i> | 5q32     | Hair bundle development and functioning                            |                                                                                                                                  | Mouse <i>Grxcr2</i> deletion mutants exhibit abnormal vestibular evoked potentials.                                                                                                        | [64]     |
| <i>DFNB103</i><br>(607293)                  | <i>CLIC5</i>  | 6p21.1   | Hair bundle development and functioning<br>Cochlea ion homeostasis | Vestibular dysfunction later in life.                                                                                            | Vestibular dysfunction in mouse model of <i>DFNB103</i> <i>Jitterbug</i> ( <i>jbg/jbg</i> ).                                                                                               | [65, 66] |
| <i>DFNB108</i><br>(602336)                  | <i>ROR1</i>   | 1p31.3   | Synaptic transmission                                              | Fusion of the cochlea and vestibule into a common cavity.                                                                        |                                                                                                                                                                                            | [67]     |
| <i>DFNB109</i><br>(612959)                  | <i>ESRP1</i>  | 1p13.3   | Hair cell's adhesion and maintenance                               | Vestibular dysplasia.                                                                                                            | Mouse <i>Esrp1</i> <sup>-/-</sup> : common crus and lateral semicircular canal dysgenesis.                                                                                                 | [68]     |
| <i>DFNB110</i><br>(603196)                  | <i>COCH</i>   | 14q12    | Transmembrane or secreted proteins and extracellular matrix        | Two individuals tested in their first decade of life: one with mild vestibular impairment, the other normal vestibular function. |                                                                                                                                                                                            | [69]     |
| <i>DFNB111</i><br>(604873)                  | <i>MPZL2</i>  | 11q23.3  | Hair cell's adhesion and maintenance                               | Slight modifications of the vestibular function.                                                                                 |                                                                                                                                                                                            | [70]     |
| <i>DFNX2</i><br>(300039)                    | <i>POU3F4</i> | Xq21.1   | Transcriptional regulation                                         | Middle and inner ear malformation with perilymphatic Gusher.<br>Severe vestibular dysfunction.                                   | <i>Pou3f4</i> -deficient mice: impaired balance, loss of vestibular hair cells                                                                                                             | [71, 72] |
| <b>SYNDROMIC HEARING LOSS</b>               |               |          |                                                                    |                                                                                                                                  |                                                                                                                                                                                            |          |
| <i>Jervell and Lange-Nielsen syndrome 1</i> | <i>KCNQ1</i>  |          | Cochlea ion homeostasis                                            | Severe vestibular dysfunction and delayed motor skills.                                                                          | Vestibular dysfunction in <i>Kcnq1</i> <sup>-/-</sup> mice: head-bobbing, circling, trouble righting themselves collapse of endolymphatic space.                                           | [73, 74] |
| <i>Jervell and Lange-Nielsen syndrome 2</i> | <i>KCNE1</i>  |          | Cochlea ion homeostasis                                            | Severe vestibular dysfunction and delayed motor skills.                                                                          | Vestibular dysfunction in <i>Kcne1</i> <sup>-/-</sup> mice: head-                                                                                                                          | [74, 75] |

|                           |                         |                                                 |                                                                                                                                                                                                                                             |                                                                                                                                                                                                                                          |                  |
|---------------------------|-------------------------|-------------------------------------------------|---------------------------------------------------------------------------------------------------------------------------------------------------------------------------------------------------------------------------------------------|------------------------------------------------------------------------------------------------------------------------------------------------------------------------------------------------------------------------------------------|------------------|
|                           |                         |                                                 |                                                                                                                                                                                                                                             | bobbing, circling, abnormal development of the endolymphatic space, severe degeneration of the hair cells                                                                                                                                |                  |
| <i>Waardenburg Type 1</i> | <i>PAX3</i>             | Melanocyte development                          | Vestibular dysfunction can be observed.                                                                                                                                                                                                     |                                                                                                                                                                                                                                          | [76]             |
| <i>Waardenburg Type 2</i> | <i>MITF SNAI2 SOX10</i> | Melanocyte development<br>Melanocyte deficiency | Vestibular dysfunction can be observed.<br>Dysmorphic vestibular anatomy linked to SOX10 mutation: bilateral agenesis or hypoplasia of the semicircular canals or both, associated with an enlarged vestibule and a cochlear deformity.     |                                                                                                                                                                                                                                          | [76, 77]         |
| <i>Waardenburg Type 3</i> | <i>PAX3</i>             | Melanocyte development                          |                                                                                                                                                                                                                                             |                                                                                                                                                                                                                                          | [76]             |
| <i>Waardenburg Type 4</i> | <i>EDNRB EDN3 SOX10</i> | Melanocyte development                          | Severe vestibular dysfunction are observed.<br>Dysmorphic vestibular anatomy linked to SOX10 mutation: bilateral agenesis or hypoplasia of the semicircular canals or both, associated with an enlarged vestibule and a cochlear deformity. |                                                                                                                                                                                                                                          | [76, 77]         |
| <i>USHER1B</i>            | <i>MYO7a</i>            | Hair bundle development and functioning         | Severe vestibular dysfunction with delayed motor skills.                                                                                                                                                                                    | Mouse model ( <i>Shaker</i> ): head-tossing, hyperactivity and circling behaviors. Disorganized stereociliary bundles.<br><br>Zebrafish model ( <i>mariner mutant</i> ): circling swimming behavior. Disorganized stereociliary bundles. | [81-84]          |
| <i>USHER1D</i>            | <i>CDH23</i>            | Hair bundle development and functioning         | Severe vestibular dysfunction in most individuals with delayed motor skills.<br>Missense mutations result in either a milder form, which overlaps with clinical types USH2 or 3, or nonsyndromic deafness (DFNB12)                          | Severe vestibular dysfunction in mouse model of USH1D <i>Waltzer</i> : hyperactivity, head-tossing, circling behavior.<br><br>Severe vestibular dysfunction in zebrafish model: balance defect, circling swimming behavior.              | [84-88]          |
| <i>USHER1F</i>            | <i>PCDH15</i>           | Hair bundle development and functioning         | Severe vestibular dysfunction with delayed motor skills.                                                                                                                                                                                    | Vestibular dysfunction described for mouse with                                                                                                                                                                                          | [49, 84, 89, 90] |

|                     |                                                                              |                                                                  |                                                                                                                                                                    |                                                                                                                                                                                                                                                                                                            |             |
|---------------------|------------------------------------------------------------------------------|------------------------------------------------------------------|--------------------------------------------------------------------------------------------------------------------------------------------------------------------|------------------------------------------------------------------------------------------------------------------------------------------------------------------------------------------------------------------------------------------------------------------------------------------------------------|-------------|
|                     |                                                                              |                                                                  |                                                                                                                                                                    | mutation of <i>Pcdh15</i> <i>Ames waltzer</i> ( <i>av</i> ) and distorted stereocilia bundles.                                                                                                                                                                                                             |             |
|                     |                                                                              |                                                                  |                                                                                                                                                                    | Vestibular defect in zebrafish <i>Pcdh15</i> mutants.                                                                                                                                                                                                                                                      |             |
| <i>USHER1C</i>      | <i>Ush1c</i>                                                                 | Hair bundle development and functioning<br>Synaptic transmission | Severe vestibular dysfunction with delayed motor skills.                                                                                                           | Severe vestibular dysfunction in mouse model of <i>USH1C</i> <i>Waltzer</i> : hyperactivity, head-tossing, circling behavior and disorganized stereocilia bundles.<br><br>Severe vestibular dysfunction in zebrafish model of <i>USH1C</i> : circling swimming behavior, disorganized stereocilia bundles. | [84, 91-93] |
| <i>USHER1G</i>      | <i>sans</i>                                                                  | Hair bundle development and functioning                          | Severe vestibular dysfunction with delayed motor skills.<br>Atypical <i>USH1</i> has also been associated with mutations in the <i>SANS</i> gene ( <i>USH1G</i> ). |                                                                                                                                                                                                                                                                                                            | [84]        |
| <i>USHER Type 2</i> | <i>ADGRV1</i><br><i>VLGR1</i><br><i>GPR98</i><br><i>USH2A</i><br><i>WHRN</i> | Hair bundle development and functioning                          | Variable vestibular function.                                                                                                                                      | <i>Whrn<sup>wi</sup></i> mice and <i>Whrn<sup>neo</sup></i> mice have severe to profound loss of linear vestibular evoked potential responses and shorter stereocilia.                                                                                                                                     | [94, 95]    |
| <i>USHER Type 3</i> | <i>CLRN1</i><br><i>HARS</i>                                                  | Hair bundle development and functioning                          | Variable vestibular function.                                                                                                                                      | Progressive vestibular loss in <i>Clrn1</i> <sup>-/-</sup> mice.                                                                                                                                                                                                                                           | [96, 97]    |
| <i>Pendred</i>      | <i>SLC26A4</i><br><i>EPHA2</i><br><i>EPHB2</i>                               |                                                                  | Dysmorphic vestibular anatomy/<br>large vestibular aqueduct.<br>Mild vestibular dysfunction primarily in saccul.                                                   | Mouse model <i>Slc26a4<sup>Δ/Δ</sup></i> has an enlarged vestibular aqueduct and a Mondini-like dysplasia of the cochlea.<br>Mouse model <i>Ephb2</i> : abnormal otoconia, dysplasia of endolymphatic fluid space, absence of endolymphatic duct.                                                          | [98-101]    |
| <i>DRTA</i>         | <i>ATP6V1B1</i><br><i>ATP6V0A4</i>                                           | Absent endocochlear potential                                    | Large vestibular aqueduct.<br>Vestibular dysfunction can be observed.                                                                                              |                                                                                                                                                                                                                                                                                                            | [102]       |

|                                |                                           |                       |                                                                                                                                                                  |                                                                                                                                                                                                                                                                     |            |
|--------------------------------|-------------------------------------------|-----------------------|------------------------------------------------------------------------------------------------------------------------------------------------------------------|---------------------------------------------------------------------------------------------------------------------------------------------------------------------------------------------------------------------------------------------------------------------|------------|
| <i>BOR</i>                     | <i>EYA1</i><br><i>SIX1</i><br><i>SIX5</i> | Inner ear development | Dysmorphic vestibular anatomy/<br>large vestibular aqueduct.                                                                                                     | Mouse model: head bobbing,<br>vestibular dysmorphology.<br>Reduced number of hair<br>cells.<br><br>Zebrafish model: imbalanced<br>and circling swimming<br>behavior, small otoliths,<br>absent hair cells in cristae,<br>reduced number of hair cells<br>in maculae | [103-108]  |
| <i>22q11 deletion syndrome</i> |                                           |                       | Frequent vestibular dysfunction.<br>Frequent inner ear malformations<br>particularly the lateral semi-<br>circular canal .                                       |                                                                                                                                                                                                                                                                     | [109, 110] |
| <i>CHARGE</i>                  | <i>Chd7</i><br><i>Sema3e</i>              | Inner ear development | Severe vestibular dysfunction with<br>frequent delayed motor skills.<br>Semi-circular canal hypoplasia or<br>agenesis.<br>Vestibulocochlear nerve<br>hypoplasia. | Severe vestibular<br>dysfunction in mouse model:<br>head shaking and circling<br>behavior. Inner ear<br>malformation.                                                                                                                                               | [111-114]  |

## **REFERENCES**

1. Lalwani, A.K., et al., *Further characterization of the DFNA1 audiovestibular phenotype*. Arch Otolaryngol Head Neck Surg, 1998. **124**(6): p. 699-702.
2. Todt, I., et al., *Vestibular dysfunction of patients with mutations of Connexin 26*. Neuroreport, 2005. **16**(11): p. 1179-81.
3. Melchionda, S., et al., *Functional characterization of a novel Cx26 (T55N) mutation associated to non-syndromic hearing loss*. Biochem Biophys Res Commun, 2005. **337**(3): p. 799-805.
4. Chang-Chien, J., et al., *The connexin 30.3 of zebrafish homologue of human connexin 26 may play similar role in the inner ear*. Hear Res, 2014. **313**: p. 55-66.
5. Hurle, B., et al., *Physical mapping of the mouse tilted locus identifies an association between human deafness loci DFNA6/14 and vestibular system development*. Genomics, 2001. **77**(3): p. 189-99.
6. Kunst, H., et al., *Autosomal dominant non-syndromal low-frequency sensorineural hearing impairment linked to chromosome 4p16 (DFNA14): statistical analysis of hearing threshold in relation to age and evaluation of vestibulo-ocular functions*. Audiology, 1999. **38**(3): p. 165-73.
7. Wesdorp, M., et al., *Heterozygous missense variants of LMX1A lead to nonsyndromic hearing impairment and vestibular dysfunction*. Hum Genet, 2018. **137**(5): p. 389-400.
8. Bergstrom, D.E., L.H. Gagnon, and E.M. Eicher, *Genetic and physical mapping of the dreher locus on mouse chromosome 1*. Genomics, 1999. **59**(3): p. 291-9.

9. Millonig, J.H., K.J. Millen, and M.E. Hatten, *The mouse Dreher gene Lmx1a controls formation of the roof plate in the vertebrate CNS*. Nature, 2000. **403**(6771): p. 764-9.
10. de Kok, Y.J., et al., *A Pro51Ser mutation in the COCH gene is associated with late onset autosomal dominant progressive sensorineural hearing loss with vestibular defects*. Hum Mol Genet, 1999. **8**(2): p. 361-6.
11. Khetarpal, U., *DFNA9 is a progressive audiovestibular dysfunction with a microfibrillar deposit in the inner ear*. Laryngoscope, 2000. **110**(8): p. 1379-84.
12. Usami, S., et al., *Mutations in the COCH gene are a frequent cause of autosomal dominant progressive cochleo-vestibular dysfunction, but not of Meniere's disease*. Eur J Hum Genet, 2003. **11**(10): p. 744-8.
13. Kemperman, M.H., et al., *Audiometric, vestibular, and genetic aspects of a DFNA9 family with a G88E COCH mutation*. Otol Neurotol, 2005. **26**(5): p. 926-33.
14. Pauw, R.J., et al., *Clinical characteristics of a Dutch DFNA9 family with a novel COCH mutation, G87W*. Audiol Neurotol, 2007. **12**(2): p. 77-84.
15. Pauw, R.J., et al., *Phenotype description of a novel DFNA9/COCH mutation, I109T*. Ann Otol Rhinol Laryngol, 2007. **116**(5): p. 349-57.
16. Street, V.A., et al., *A novel DFNA9 mutation in the vWFA2 domain of COCH alters a conserved cysteine residue and intrachain disulfide bond formation resulting in progressive hearing loss and site-specific vestibular and central oculomotor dysfunction*. Am J Med Genet A, 2005. **139A**(2): p. 86-95.
17. Verdoodt, D., et al., *On the pathophysiology of DFNA9: Effect of pathogenic variants in the COCH gene on inner ear functioning in human and transgenic mice*. Hear Res, 2021. **401**: p. 108162.
18. Jones, S.M., et al., *Hearing and vestibular deficits in the Coch(-/-) null mouse model: comparison to the Coch(G88E/G88E) mouse and to DFNA9 hearing and balance disorder*. Hear Res, 2011. **272**(1-2): p. 42-8.
19. Bolz, H., et al., *Impaired calmodulin binding of myosin-7A causes autosomal dominant hearing loss (DFNA11)*. Hum Mutat, 2004. **24**(3): p. 274-5.
20. Bischoff, A.M., et al., *Cochleovestibular and ocular features in a Dutch DFNA11 family*. Otol Neurotol, 2006. **27**(3): p. 323-31.
21. Di Leva, F., et al., *Identification of a novel mutation in the myosin VIIA motor domain in a family with autosomal dominant hearing loss (DFNA11)*. Audiol Neurotol, 2006. **11**(3): p. 157-64.
22. Kunst, H., et al., *The phenotype of DFNA13/COL11A2: nonsyndromic autosomal dominant mid-frequency and high-frequency sensorineural hearing impairment*. Am J Otol, 2000. **21**(2): p. 181-7.
23. van Drunen, F.J., et al., *Vestibular impairment in a Dutch DFNA15 family with an L289F mutation in POU4F3*. Audiol Neurotol, 2009. **14**(5): p. 303-7.
24. de Heer, A.M., et al., *Mild and variable audiometric and vestibular features in a third DFNA15 family with a novel mutation in POU4F3*. Ann Otol Rhinol Laryngol, 2009. **118**(4): p. 313-20.
25. Hertzano, R., et al., *Transcription profiling of inner ears from Pou4f3(ddl/ddl) identifies Gfil as a target of the Pou4f3 deafness gene*. Hum Mol Genet, 2004. **13**(18): p. 2143-53.
26. Lalwani, A.K., et al., *A new locus for nonsyndromic hereditary hearing impairment, DFNA17, maps to chromosome 22 and represents a gene for cochleosaccular degeneration*. Am J Hum Genet, 1999. **64**(1): p. 318-23.
27. Kemperman, M.H., et al., *A Dutch family with hearing loss linked to the DFNA20/26 locus: longitudinal analysis of hearing impairment*. Arch Otolaryngol Head Neck Surg, 2004. **130**(3): p. 281-8.

28. Wong, E.Y., et al., *A Novel ENU-Induced Mutation in Myo6 Causes Vestibular Dysfunction and Deafness*. PLoS One, 2016. **11**(5): p. e0154984.
29. Melchionda, S., et al., *MYO6, the human homologue of the gene responsible for deafness in Snell's waltzer mice, is mutated in autosomal dominant nonsyndromic hearing loss*. Am J Hum Genet, 2001. **69**(3): p. 635-40.
30. Han, Y., et al., *Grhl2 deficiency impairs otic development and hearing ability in a zebrafish model of the progressive dominant hearing loss DFNA28*. Hum Mol Genet, 2011. **20**(16): p. 3213-26.
31. Chen, X., et al., *Generation and characterization of a P2rx2 V60L mouse model for DFNA41*. Hum Mol Genet, 2021. **30**(11): p. 985-995.
32. Zazo Seco, C., et al., *Allelic Mutations of KITLG, Encoding KIT Ligand, Cause Asymmetric and Unilateral Hearing Loss and Waardenburg Syndrome Type 2*. Am J Hum Genet, 2015. **97**(5): p. 647-60.
33. Krey, J.F., et al., *Plastin 1 widens stereocilia by transforming actin filament packing from hexagonal to liquid*. J Cell Biol, 2016. **215**(4): p. 467-482.
34. Delpire, E., et al., *Deafness and imbalance associated with inactivation of the secretory Na-K-2Cl co-transporter*. Nat Genet, 1999. **22**(2): p. 192-5.
35. Flagella, M., et al., *Mice lacking the basolateral Na-K-2Cl cotransporter have impaired epithelial chloride secretion and are profoundly deaf*. J Biol Chem, 1999. **274**(38): p. 26946-55.
36. McNeill, A., et al., *SLC12A2 variants cause a neurodevelopmental disorder or cochleovestibular defect*. Brain, 2020. **143**(8): p. 2380-2387.
37. Dodson, K.M., et al., *Vestibular dysfunction in DFNB1 deafness*. Am J Med Genet A, 2011. **155A**(5): p. 993-1000.
38. Hildebrand, M.S., et al., *Variable hearing impairment in a DFNB2 family with a novel MYO7A missense mutation*. Clin Genet, 2010. **77**(6): p. 563-71.
39. Liang, Y., et al., *Genetic mapping refines DFNB3 to 17p11.2, suggests multiple alleles of DFNB3, and supports homology to the mouse model shaker-2*. Am J Hum Genet, 1998. **62**(4): p. 904-15.
40. Probst, F.J., et al., *Correction of deafness in shaker-2 mice by an unconventional myosin in a BAC transgene*. Science, 1998. **280**(5368): p. 1444-7.
41. Roesch, S., et al., *Genetic Determinants of Non-Syndromic Enlarged Vestibular Aqueduct: A Review*. Audiol Res, 2021. **11**(3): p. 423-442.
42. Mitchem, K.L., et al., *Mutation of the novel gene Tmie results in sensory cell defects in the inner ear of spinner, a mouse model of human hearing loss DFNB6*. Hum Mol Genet, 2002. **11**(16): p. 1887-98.
43. Weegerink, N.J., et al., *Genotype-phenotype correlation in DFNB8/10 families with TMPRSS3 mutations*. J Assoc Res Otolaryngol, 2011. **12**(6): p. 753-66.
44. Fasquelle, L., et al., *Tmprss3, a transmembrane serine protease deficient in human DFNB8/10 deafness, is critical for cochlear hair cell survival at the onset of hearing*. J Biol Chem, 2011. **286**(19): p. 17383-97.
45. Frykholm, C., et al., *Stereocilin gene variants associated with episodic vertigo: expansion of the DFNB16 phenotype*. Eur J Hum Genet, 2018. **26**(12): p. 1871-1874.
46. Schraders, M., et al., *Mutations of the gene encoding otogelin are a cause of autosomal-recessive nonsyndromic moderate hearing impairment*. Am J Hum Genet, 2012. **91**(5): p. 883-9.
47. Yu, S., et al., *A novel early truncation mutation in OTOG causes prelingual mild hearing loss without vestibular dysfunction*. Eur J Med Genet, 2019. **62**(1): p. 81-84.

48. Simmler, M.C., et al., *Twister mutant mice are defective for otogelin, a component specific to inner ear acellular membranes*. Mamm Genome, 2000. **11**(11): p. 961-966.
49. Alagramam, K.N., et al., *The mouse Ames waltzer hearing-loss mutant is caused by mutation of Pcdh15, a novel protocadherin gene*. Nat Genet, 2001. **27**(1): p. 99-102.
50. Mori, K., et al., *Novel mutation in GRXCRI at DFNB25 lead to progressive hearing loss and dizziness*. Ann Otol Rhinol Laryngol, 2015. **124 Suppl 1**: p. 129S-34S.
51. Mathur, P.D., et al., *A study of whirlin isoforms in the mouse vestibular system suggests potential vestibular dysfunction in DFNB31-deficient patients*. Hum Mol Genet, 2015. **24**(24): p. 7017-30.
52. Naz, S., et al., *Mutations of ESPN cause autosomal recessive deafness and vestibular dysfunction*. J Med Genet, 2004. **41**(8): p. 591-5.
53. Ahmed, Z.M., et al., *Mutations of MYO6 are associated with recessive deafness, DFNB37*. Am J Hum Genet, 2003. **72**(5): p. 1315-22.
54. Ebermann, I., et al., *Truncating mutation of the DFNB59 gene causes cochlear hearing impairment and central vestibular dysfunction*. Hum Mutat, 2007. **28**(6): p. 571-7.
55. MacLennan, A.J., et al., *The SIP2 sphingosine 1-phosphate receptor is essential for auditory and vestibular function*. Hear Res, 2006. **220**(1-2): p. 38-48.
56. Kono, M., et al., *Deafness and stria vascularis defects in SIP2 receptor-null mice*. J Biol Chem, 2007. **282**(14): p. 10690-6.
57. Hu, Z.Y., et al., *Gene miles-apart is required for formation of otic vesicle and hair cells in zebrafish*. Cell Death Dis, 2013. **4**: p. e900.
58. Herr, D.R., et al., *Sphingosine 1-phosphate (SIP) signaling is required for maintenance of hair cells mainly via activation of SIP2*. J Neurosci, 2007. **27**(6): p. 1474-8.
59. Santos-Cortez, R.L., et al., *Autosomal-Recessive Hearing Impairment Due to Rare Missense Variants within SIPR2*. Am J Hum Genet, 2016. **98**(2): p. 331-8.
60. Mauriac, S.A., et al., *Defective Gpsm2/Ga*. Nat Commun, 2017. **8**: p. 14907.
61. Goodyear, R.J., et al., *Hair bundle defects and loss of function in the vestibular end organs of mice lacking the receptor-like inositol lipid phosphatase PTPRQ*. J Neurosci, 2012. **32**(8): p. 2762-72.
62. Schraders, M., et al., *Mutations in PTPRQ are a cause of autosomal-recessive nonsyndromic hearing impairment DFNB84 and associated with vestibular dysfunction*. Am J Hum Genet, 2010. **86**(4): p. 604-10.
63. Guevar, J., et al., *Deafness and vestibular dysfunction in a Doberman Pinscher puppy associated with a mutation in the PTPRQ gene*. J Vet Intern Med, 2018. **32**(2): p. 665-669.
64. Avenarius, M.R., et al., *Grxcr2 is required for stereocilia morphogenesis in the cochlea*. PLoS One, 2018. **13**(8): p. e0201713.
65. Seco, C.Z., et al., *Progressive hearing loss and vestibular dysfunction caused by a homozygous nonsense mutation in CLIC5*. Eur J Hum Genet, 2015. **23**(2): p. 189-94.
66. Gagnon, L.H., et al., *The chloride intracellular channel protein CLIC5 is expressed at high levels in hair cell stereocilia and is essential for normal inner ear function*. J Neurosci, 2006. **26**(40): p. 10188-98.
67. Diaz-Horta, O., et al., *ROR1 is essential for proper innervation of auditory hair cells and hearing in humans and mice*. Proc Natl Acad Sci U S A, 2016. **113**(21): p. 5993-8.
68. Rohacek, A.M., et al., *ESRP1 Mutations Cause Hearing Loss due to Defects in Alternative Splicing that Disrupt Cochlear Development*. Dev Cell, 2017. **43**(3): p. 318-331.e5.
69. JanssensdeVarebeke, S.P.F., et al., *Bi-allelic inactivating variants in the COCH gene cause autosomal recessive prelingual hearing impairment*. Eur J Hum Genet, 2018. **26**(4): p. 587-591.

70. Wesdorp, M., et al., *MPZL2, Encoding the Epithelial Junctional Protein Myelin Protein Zero-like 2, Is Essential for Hearing in Man and Mouse*. Am J Hum Genet, 2018. **103**(1): p. 74-88.
71. Xiang, M., et al., *Essential role of POU-domain factor Brn-3c in auditory and vestibular hair cell development*. Proc Natl Acad Sci U S A, 1997. **94**(17): p. 9445-50.
72. Cremers, C.W. and P.L. Huygen, *Clinical features of female heterozygotes in the X-linked mixed deafness syndrome (with perilymphatic gusher during stapes surgery)*. Int J Pediatr Otorhinolaryngol, 1983. **6**(2): p. 179-85.
73. Casimiro, M.C., et al., *Targeted disruption of the Kcnq1 gene produces a mouse model of Jervell and Lange-Nielsen Syndrome*. Proc Natl Acad Sci U S A, 2001. **98**(5): p. 2526-31.
74. Winbo, A. and A. Rydberg, *Vestibular dysfunction is a clinical feature of the Jervell and Lange-Nielsen Syndrome*. Scand Cardiovasc J, 2015. **49**(1): p. 7-13.
75. Wu, X., et al., *Gene therapy via canalostomy approach preserves auditory and vestibular functions in a mouse model of Jervell and Lange-Nielsen syndrome type 2*. Nat Commun, 2021. **12**(1): p. 697.
76. Black, F.O., et al., *A vestibular phenotype for Waardenburg syndrome?* Otol Neurotol, 2001. **22**(2): p. 188-94.
77. Elmaleh-Bergès, M., et al., *Spectrum of temporal bone abnormalities in patients with Waardenburg syndrome and SOX10 mutations*. AJNR Am J Neuroradiol, 2013. **34**(6): p. 1257-63.
78. Deol, M.S., *The relationship between abnormalities of pigmentation and of the inner ear*. Proc R Soc Lond B Biol Sci, 1970. **175**(39): p. 201-17.
79. Hodgkinson, C.A., et al., *Mutations at the mouse microphthalmia locus are associated with defects in a gene encoding a novel basic-helix-loop-helix-zipper protein*. Cell, 1993. **74**(2): p. 395-404.
80. Tassabehji, M., V.E. Newton, and A.P. Read, *Waardenburg syndrome type 2 caused by mutations in the human microphthalmia (MITF) gene [see comments]*. Nat Genet, 1994. **8**(3): p. 251-5.
81. Ernest, S., et al., *Mariner is defective in myosin VIIA: a zebrafish model for human hereditary deafness*. Hum Mol Genet, 2000. **9**(14): p. 2189-96.
82. Gibson, F., et al., *A type VII myosin encoded by the mouse deafness gene shaker-1*. Nature, 1995. **374**(6517): p. 62-4.
83. Weil, D., et al., *Human myosin VIIA responsible for the Usher 1B syndrome: a predicted membrane-associated motor protein expressed in developing sensory epithelia*. Proc Natl Acad Sci U S A, 1996. **93**(8): p. 3232-7.
84. Yan, D. and X.Z. Liu, *Genetics and pathological mechanisms of Usher syndrome*. J Hum Genet, 2010. **55**(6): p. 327-35.
85. Bolz, H., et al., *Mutation of CDH23, encoding a new member of the cadherin gene family, causes Usher syndrome type 1D*. Nat Genet, 2001. **27**(1): p. 108-12.
86. Di Palma, F., et al., *Mutations in Cdh23, encoding a new type of cadherin, cause stereocilia disorganization in waltzer, the mouse model for Usher syndrome type 1D*. Nat Genet, 2001. **27**(1): p. 103-7.
87. Söllner, C., et al., *Mutations in cadherin 23 affect tip links in zebrafish sensory hair cells*. Nature, 2004. **428**(6986): p. 955-9.
88. Pennings, R.J., et al., *Variable clinical features in patients with CDH23 mutations (USH1D-DFNB12)*. Otol Neurotol, 2004. **25**(5): p. 699-706.
89. Raphael, Y., et al., *Severe vestibular and auditory impairment in three alleles of Ames waltzer (av) mice*. Hear Res, 2001. **151**(1-2): p. 237-249.
90. Barber Phillips, J., et al., *Zebrafish PCDH15 (USH1F) mutants display visual and audiovestibular defects*. Investigative Ophthalmology & Visual Science, 2021. **62**: p. 2259.
91. Lentz, J., et al., *Ush1c216A knock-in mouse survives Katrina*. Mutat Res, 2007. **616**(1-2): p. 139-44.

92. Phillips, J.B., et al., *Harmonin (Ush1c) is required in zebrafish Müller glial cells for photoreceptor synaptic development and function*. Dis Model Mech, 2011. **4**(6): p. 786-800.
93. Smith, R.J., et al., *Clinical variability and genetic heterogeneity within the Acadian Usher population*. Am J Med Genet, 1992. **43**(6): p. 964-9.
94. Mathur, P.D. and J. Yang, *Usher syndrome and non-syndromic deafness: Functions of different whirlin isoforms in the cochlea, vestibular organs, and retina*. Hear Res, 2019. **375**: p. 14-24.
95. Magliulo, G., et al., *Usher's Syndrome Type II: A Comparative Study of Genetic Mutations and Vestibular System Evaluation*. Otolaryngol Head Neck Surg, 2017. **157**(5): p. 853-860.
96. Joensuu, T., et al., *Mutations in a novel gene with transmembrane domains underlie Usher syndrome type 3*. Am J Hum Genet, 2001. **69**(4): p. 673-84.
97. Geng, R., et al., *Usher syndrome IIIA gene clarin-1 is essential for hair cell function and associated neural activation*. Hum Mol Genet, 2009. **18**(15): p. 2748-60.
98. West, N.C., A.C. Ryberg, and P. Cayé-Thomasen, *Vestibular Function in Pendred Syndrome: Intact High Frequency VOR and Saccular Hypersensitivity*. Otol Neurotol, 2021. **42**(9): p. e1327-e1332.
99. Wangemann, P., *Mouse models for pendrin-associated loss of cochlear and vestibular function*. Cell Physiol Biochem, 2013. **32**(7): p. 157-65.
100. Raft, S., et al., *Ephrin-B2 governs morphogenesis of endolymphatic sac and duct epithelia in the mouse inner ear*. Dev Biol, 2014. **390**(1): p. 51-67.
101. Li, M., et al., *Digenic inheritance of mutations in EPHA2 and SLC26A4 in Pendred syndrome*. Nat Commun, 2020. **11**(1): p. 1343.
102. Berrettini, S., et al., *Distal renal tubular acidosis associated with isolated large vestibular aqueduct and sensorineural hearing loss*. Ann Otol Rhinol Laryngol, 2002. **111**(5 Pt 1): p. 385-91.
103. Ceruti, S., et al., *Temporal bone anomalies in the branchio-oto-renal syndrome: detailed computed tomographic and magnetic resonance imaging findings*. Otol Neurotol, 2002. **23**(2): p. 200-7.
104. Bosman, E.A., et al., *Catweasel mice: a novel role for Six1 in sensory patch development and a model for branchio-oto-renal syndrome*. Dev Biol, 2009. **328**(2): p. 285-96.
105. Kozłowski, D.J., et al., *The zebrafish dog-eared mutation disrupts eya1, a gene required for cell survival and differentiation in the inner ear and lateral line*. Dev Biol, 2005. **277**(1): p. 27-41.
106. Xu, P.X., et al., *Eya1-deficient mice lack ears and kidneys and show abnormal apoptosis of organ primordia*. Nat Genet, 1999. **23**(1): p. 113-7.
107. Zou, D., et al., *Eya1 gene dosage critically affects the development of sensory epithelia in the mammalian inner ear*. Hum Mol Genet, 2008. **17**(21): p. 3340-56.
108. Song, M.H., et al., *Mutational analysis of EYA1, SIX1 and SIX5 genes and strategies for management of hearing loss in patients with BOR/BO syndrome*. PLoS One, 2013. **8**(6): p. e67236.
109. Willaert, A., et al., *Vestibular dysfunction is a manifestation of 22q11.2 deletion syndrome*. Am J Med Genet A, 2019. **179**(3): p. 448-454.
110. Verheij, E., et al., *Anatomic Malformations of the Middle and Inner Ear in 22q11.2 Deletion Syndrome: Case Series and Literature Review*. AJNR Am J Neuroradiol, 2018. **39**(5): p. 928-934.
111. Bosman, E.A., et al., *Multiple mutations in mouse Chd7 provide models for CHARGE syndrome*. Hum Mol Genet, 2005. **14**(22): p. 3463-76.

112. Jongmans, M.C., et al., *Familial CHARGE syndrome and the CHD7 gene: a recurrent missense mutation, intrafamilial recurrence and variability*. Am J Med Genet A, 2008. **146A**(1): p. 43-50.
113. Aramaki, M., et al., *Phenotypic spectrum of CHARGE syndrome with CHD7 mutations*. J Pediatr, 2006. **148**(3): p. 410-4.
114. Martin, D.M., S. Sheldon, and J.L. Gorski, *CHARGE association with choanal atresia and inner ear hypoplasia in a child with a de novo chromosome translocation t(2;7)(p14;q21.11)*. Am J Med Genet, 2001. **99**(2): p. 115-9.
